# Supplementary material for: The making of a new pathogen: Insights from comparative population genomics of the domesticated wheat pathogenMycosphaerella graminicolaand its wild sister species
Source: HighWire-hosted journal article supplement (doi:10.1101/gr.118851.110), 2011-10-12
Supplement: TableS1.xlsx [file TableS1.xlsx]

## Sheet: Sheet1
Collection of Mycospharella isolates
Isolate	Host	Population	S1	S2	Mating type	GPID3)
M. graminicola IPO323 1)	Triticum aestivum	The Netherlands			Mat1-1	19047
STIR01A 26b	Triticum aestivum	Iran, Ardabil			Mat1-2	62705
STIR01A 48b	Triticum aestivum	Iran, Ardabil			Mat1-2	63029
STIR04 3.11.1	Agropyron sp	Iran, Ardabil, population 3 2)	x		Mat1-1	46489
STIR04 2.2.1	Dactylis sp	Iran, Ardabil, population 2	x		Mat1-1	63031
STIR04 4.3.1	Agropyron sp	Iran, Ardabil, population 4	x		Mat1-2	63035
STIR04 5.3	Dactylis sp	Iran, Ardabil, population 5	x		Mat1-2	63037
STIR04 5.9.1	Dactylis sp	Iran, Ardabil, population 5	x		Mat1-1	63039
STIR04 3.3.2	Agropyron sp	Iran, Ardabil, population 3		x	Mat1-2	63047
STIR04 3.13.1	Agropyron sp	Iran, Ardabil, population 3		x	Mat1-2	63045
STIR04 1.1.1	Lolium sp	Iran, Ardabil, population 1		x	Mat1-1	63041
STIR04 1.1.2	Lolium sp	Iran, Ardabil, population 1		x	Mat1-1	63043
S. passerinii	Hordeum vulgare	USA			Mat1-1	63049
1) Reference genome see (17)
2) Number of population refers to sampling location, see ref. Stukenbrock et al, 2007
3) NCBI genome project ID, see http://www.ncbi.nlm.nih.gov/genomes/leuks.cgi?p1=10%3A0&p3=11:Fungi|12%3A&taxgroup=11:Fungi|12%3A&
