# Supplementary material for: The making of a new pathogen: Insights from comparative population genomics of the domesticated wheat pathogenMycosphaerella graminicolaand its wild sister species
Source: HighWire-hosted journal article supplement (doi:10.1101/gr.118851.110), 2011-10-12
Supplement: TableS3.xlsx [file TableS3.xlsx]

## Sheet: Sheet1
	Chr no.	Reference chromosome length	Reference codons	M. graminicola alignment length	M. graminicola aligned codons	S1 alignment length	S1 aligned codons	S2 alignment length	S2 aligned codons	S. passerinii alignment length	S. passerinii aligned codons
Essential	1	6119516	880508	5683181	832969	5489349	825669	5493758	828830	4094701	746771
	2	3877257	531408	3217878	475519	3105217	476951	3055404	470983	2213300	418561
	3	3521896	47562	3076820	325997	2970206	352018	2988581	339381	2100168	383233
	4	2892740	375563	2487436	338263	2340217	348240	2341177	338479	1628372	298213
	5	2873973	351463	2300116	314425	2194956	315131	2179349	316158	1509414	269834
	6	2686295	312357	1978868	282200	1904465	273959	1995162	293462	1327345	241578
	7	2676027	306082	2016456	260611	1809141	248490	1855422	243202	1038558	175943
	8	2453492	298989	1868634	257687	1869950	268646	1861652	264979	1260063	225796
	9	2151231	271317	1548721	224148	1537389	237693	1573578	235632	1081123	201303
	10	1689705	243328	1344005	212197	1324894	217811	1364590	218040	919750	179920
	11	1632476	219657	1348263	190178	1346391	195813	1374648	196051	908625	169525
	12	1470463	170014	1181096	146947	1179516	149879	1155790	149990	773082	123443
	13	1191065	130972	921855	112808	876311	111713	837195	108721	500529	82971
Dispensable	14	774137	35065	260156	425	154565	6272	131816	332	241822	14139
	15	641641	22263	316821	17188	147959	14223	131670	3018	117160	4229
	16	609134	26440	291908	17304	246171	12616	271597	14842	130323	5790
	17	586944	20299	413198	18954	338248	16356	207074	8650	137267	5084
	18	574302	20647	43746	272	91819	1205	127454	3803	95064	5002
	19	551115	19173	340412	16626	109638	5296	126598	2514	117522	4374
	20	474406	22804	35520	20027	79492	15619	158144	4956	159079	10965
	21	410414	17871	34176	15838	155564	7636	155747	9095	55232	2465
	Genome total	39858229	4323782	30709266	4080583	29271458	4101236	29386406	4051118	20408499	3569139
