# Supplementary material for: The making of a new pathogen: Insights from comparative population genomics of the domesticated wheat pathogenMycosphaerella graminicolaand its wild sister species
Source: HighWire-hosted journal article supplement (doi:10.1101/gr.118851.110), 2011-10-12
Supplement: TableS4.xlsx [file TableS4.xlsx]

## Sheet: Sheet1
	STIR04 1.1.1		STIR04 1.1.2		STIR04 3.3.2		STIR04 3.13.1		STIR04 3.11.1		STIR04 4.3.1		STIR04 5.9.1		STIR04 2.2.1		STIR04 5.3		STIR01A 26b		STIR01A 48b		S. Passerinii P63
Size (mb)	Size	Number	Size	Number	Size	Number	Size	Number	Size	Number	Size	Number	Size	Number	Size	Number	Size	Number	Size	Number	Size	Number	Size	Number
0.8									0.82-0.86	(2-4)-3	0.81-0.83	(1)-2			0.8	1-(2)	0.84-0.87	(1)-2
0.7													0.79-0.83	(1)-2			0.79-0.81	2-(3)	0.74	1
0.6									0.67-0.75	1	0.68	(1)-2	0.65-0.70	(1)-2	0.61	1-(2)	0.68-0.70	1-(2)	0.69-0.71	2-(3)	0.66-0.67	1
									0.65-0.70	1									0.63-0.64	1	0.61-0.62	1
0.5									0.58-0.64	1									0.58-0.63	1
									0.52-0.60	1									0.50-0.52	(1)-2	0.53-0.55	1
0.4	0.49-0.52	1-(2)	0.49-0.52	1-(2)	0.43-0.51	3- (4)	0.43-0.51	3- (4)			0.48-0.50	(1) -2			0.48-0.50	1-(2)					0.49-0.51	1	0.49-0.51	(1)-2
	0.44-0.46	1-(2)	0.44-0.46	1-(2)																	0.44-0.45	1
																					0.40-0.42	1
0.3	0.34-0.36	1	0.34-0.36	1	0.36-0.40	(1)-2	0.36-0.40	(1)-2					0.39-0.43	(1)-2									0.39-0.42	(1)-2
					0.34-0.38	(1)-2	0.34-0.38	(1)-2															0.32-0.34	(1)-2
0.2	0.27-0.28	1(?)	0.27-0.28	1(?)
min number		4		4		5		5		6		3		3		3		4		6		6		3
max number		6		6		8		8		8		6		6		6		7		8		6		6
Estimated number		4		4		7to8		7to8		7to8		6		6		6		6to7		7to8		6		6
