# Supplementary material for: The making of a new pathogen: Insights from comparative population genomics of the domesticated wheat pathogenMycosphaerella graminicolaand its wild sister species
Source: HighWire-hosted journal article supplement (doi:10.1101/gr.118851.110), 2011-10-12
Supplement: TableS5.xlsx [file TableS5.xlsx]

## Sheet: Sheet1
chr		count	Sum Mg polymorphisms	Sum type 1 shared polymorphisms	Sum type 2 shared polymorphisms	Mean shared poly. Mg (of all Mg polymorphs)	Mean type 11) shared poly. Mg (of all Mg polymorphs)	Mean type 22) shared poly. Mg (of all Mg polymorphs)	Mean shared poly. S1 (of all S1 polymorphs)	Mean type 1 shared poly. S1 (of all S1 polymorphs)	Mean type 2 shared poly. S1 (of all S1 polymorphs)	Ratio type1/type2 (Mg)	Ratio type1/type2 (S1)	Mean dxy 3) MgS1	Mean Pi4) (Mg)	Mean Pi (S1)	Median dxy MgS1	Median Pi (Mg)	Median Pi (S1)		count	Sum Mg polymorphisms	Sum type 1 shared polymorphisms	Sum type 2 shared polymorphisms	Mean shared poly. Mg (of all Mg polymorphs)	Mean type 1 shared poly. Mg (of all Mg polymorphs)	Mean type 2 shared poly. Mg (of all Mg polymorphs)	Mean shared poly. (of all S2 polymorphs)	Mean type1 shared poly. S2 (of all S2 polymorphs)	Mean type 2 shared poly. S2 (of all S2 polymorphs)	Ratio type1/type2 (Mg)	Ratio type1/type2 (S2)	Mean dxy MgS2	Mean Pi (S2)	Median dxy MgS2	Median Pi (S2)
1	S1	4544798	65701	2360	1121	0.0529199	0.0368373	0.0160826	0.0551215	0.0357041	0.0194174	2.29051	1.83877	0.077313	0.0159855	0.0182673	0.0714509	0.0144512	0.00793086	S2	4551933	67461	924	968	0.0312071	0.0167269	0.0144803	0.031461	0.0154894	0.0159715	1.15515	0.969816	0.121783	0.0159411	0.115057	0.0102853
2		2445330	32426	1103	595	0.0569406	0.0389528	0.0179878	0.0409658	0.0283144	0.0126514	2.16552	2.23804	0.0871229	0.0163151	0.0209956	0.0810946	0.0134898	0.00836502		2446756	33218	501	485	0.0369401	0.0215961	0.015344	0.0312632	0.0163917	0.0148715	1.40746	1.10222	0.126295	0.0161922	0.123514	0.0114896
3		2367186	33713	1375	621	0.0623614	0.0452354	0.017126	0.0701267	0.0455259	0.0246008	2.64132	1.85058	0.0851459	0.0163545	0.0192399	0.0804051	0.0135471	0.00847986		2398689	35122	579	612	0.043986	0.0259468	0.0180392	0.0342348	0.0187227	0.0155122	1.43836	1.20697	0.132204	0.019292	0.127684	0.0135965
4		1813896	23844	661	310	0.0424188	0.0290582	0.0133606	0.0532316	0.039125	0.0141066	2.17492	2.77351	0.0873749	0.0166181	0.0152175	0.0818331	0.0151306	0.00251714		1802834	23541	465	510	0.0457146	0.025941	0.0197736	0.0315724	0.0164076	0.0151649	1.3119	1.08195	0.137853	0.0223776	0.133425	0.0154986
5		1680639	23803	1836	917	0.10539	0.0718832	0.0335064	0.0628911	0.0439211	0.01897	2.14536	2.31529	0.0960371	0.0183866	0.0348248	0.0926808	0.0165335	0.0293236		1680639	23803	1836	917	0.10539	0.0718832	0.0335064	0.0628911	0.0439211	0.01897	2.14536	2.31529	0.0960371	0.0348248	0.0926808	0.0293236
6		1464022	21929	426	234	0.0414847	0.0264048	0.01508	0.0669646	0.0483105	0.0186542	1.75098	2.58979	0.0889716	0.0169845	0.0168787	0.0815791	0.014987	0.00201084		1510048	21991	420	450	0.060791	0.0343853	0.0264057	0.0364431	0.0188078	0.0176353	1.30219	1.06648	0.142971	0.0331246	0.129757	0.0145472
7		1354706	19820	228	103	0.0328819	0.0260182	0.00686369	0.061223	0.0437805	0.0174426	3.7907	2.50998	0.0964829	0.0177692	0.0109503	0.0900655	0.0148992	0.000724085		1344193	18231	359	361	0.0530604	0.0306754	0.022385	0.0339768	0.019802	0.0141748	1.37035	1.39699	0.161531	0.0299199	0.154573	0.0189931
8		1376077	20120	2194	1006	0.124831	0.0870098	0.037821	0.0849696	0.0572904	0.0276793	2.30057	2.06979	0.1003	0.0199074	0.041059	0.0963062	0.0184997	0.0374113		1378680	22244	386	365	0.04762	0.0254091	0.0222109	0.0423381	0.0225777	0.0197604	1.144	1.14257	0.141271	0.0295634	0.129288	0.0136093
9		1099110	20260	1263	611	0.0981066	0.0660805	0.0320261	0.0822229	0.0547225	0.0275004	2.06333	1.98988	0.104351	0.0243056	0.033735	0.096687	0.0217865	0.0221916		1082279	20790	447	464	0.0741734	0.0420194	0.032154	0.0567608	0.0318216	0.0249392	1.30682	1.27597	0.141784	0.0301414	0.13495	0.0155855
10		968568	19545	1248	631	0.101271	0.06813	0.0331407	0.0735237	0.0492526	0.0242711	2.05578	2.02927	0.100324	0.0256843	0.0342125	0.0959374	0.0240838	0.0234725		957497	20258	373	427	0.0522265	0.0290966	0.0231298	0.0538796	0.0258952	0.0279843	1.25797	0.925347	0.142171	0.0286395	0.131782	0.014721
11		967074	17181	1255	596	0.11088	0.0729137	0.0379665	0.0674684	0.0445313	0.0229371	1.92048	1.94145	0.101991	0.0230289	0.0384384	0.0985609	0.0201453	0.0324937		992717	18420	367	383	0.0554045	0.0226165	0.032788	0.0462463	0.021604	0.0246424	0.689781	0.876699	0.146765	0.0251209	0.140842	0.017374
12		824198	13032	1238	599	0.128727	0.0882653	0.0404615	0.073399	0.0480732	0.0253257	2.18146	1.8982	0.105911	0.0211411	0.0454721	0.101752	0.0184205	0.0443456		825945	14230	261	276	0.0517373	0.0283071	0.0234302	0.0443607	0.0232288	0.0211319	1.20814	1.09923	0.148052	0.0257768	0.142932	0.0172395
13		608252	10699	968	520	0.123156	0.0845929	0.0385627	0.0651076	0.0461303	0.0189774	2.19365	2.4308	0.11136	0.0209841	0.0450828	0.108528	0.0201711	0.041628		599363	11717	306	340	0.0813347	0.0429183	0.0384164	0.0477761	0.0264979	0.0212782	1.11719	1.24531	0.160765	0.0383255	0.15347	0.02325
14		3757	101	34	10	0.331691	0.206021	0.12567	0.118485	0.0921378	0.0263472	1.63937	3.49706	0.149404	0.0352358	0.118144	0.121212	0.030303	0.0789474		3603	118	22	15	0.259219	0.184753	0.0744658	0.105194	0.0511369	0.0540573	2.48104	0.945975	0.171598	0.119598	0.148148	0.0869565
15		3534	117	35	16	0.348703	0.244839	0.103864	0.154498	0.122736	0.0317618	2.3573	3.86427	0.12954	0.0468556	0.10688	0.115128	0.0368273	0.0880833		4498	182	35	15	0.233378	0.151158	0.0822202	0.118893	0.08016	0.038733	1.83845	2.06956	0.173511	0.107622	0.162393	0.0849673
16		67046	1530	97	51	0.095804	0.0631837	0.0326203	0.0530295	0.03829	0.0147394	1.93694	2.5978	0.141336	0.0291292	0.0419674	0.138562	0.0283019	0.017094		72730	1619	48	73	0.0729053	0.0410974	0.0318079	0.0548481	0.0382975	0.0165506	1.29205	2.31396	0.218121	0.0467841	0.230769	0.0380144
17		3541	133	27	11	0.201383	0.159696	0.0416869	0.108114	0.08524	0.0228744	3.83086	3.72643	0.124599	0.047029	0.0795223	0.119259	0.0471821	0.0816667		5620	208	20	7	0.144958	0.0947359	0.0502222	0.0455119	0.0301571	0.0153548	1.88633	1.96402	0.173422	0.0946833	0.170213	0.0685714
18		3013	73	16	7	0.281019	0.206481	0.074537	0.102466	0.0676117	0.0348545	2.77019	1.93983	0.147108	0.0339719	0.102277	0.146628	0.027027	0.0983607		2271	54	17	12	0.405147	0.155147	0.25	0.0865376	0.0449564	0.0415812	0.620588	1.08117	0.209854	0.192118	0.163794	0.165649
19		8004	217	35	17	0.182579	0.122242	0.0603364	0.0731547	0.0522032	0.0209515	2.02601	2.49162	0.15863	0.0321428	0.0968182	0.156733	0.0326097	0.0704575		21659	621	37	33	0.162894	0.0995221	0.0633715	0.0457858	0.0293425	0.0164433	1.57046	1.78447	0.229422	0.0954736	0.227319	0.0728682
20		3207	116	29	7	0.217908	0.174158	0.04375	0.121296	0.105375	0.0159214	3.98076	6.61847	0.132058	0.038083	0.0981106	0.13289	0.0380058	0.0868277		3126	104	20	7	0.223896	0.165718	0.0581781	0.0891415	0.060593	0.0285485	2.84846	2.12246	0.181385	0.126688	0.133482	0.0953982
21		5745	213	40	11	0.248498	0.154097	0.0944015	0.166925	0.126204	0.0407216	1.63235	3.09919	0.109797	0.0387966	0.0655448	0.108974	0.03861	0.0482456		6280	249	19	8	0.129647	0.0826236	0.0470238	0.0873226	0.0551917	0.0321309	1.75706	1.71771	0.150687	0.0604215	0.157576	0.011236
1) sites polymorphic in both species with the same nucleotide variables
2) sites polymorphic in both species with different nucleotide variables
3) nucleotide divergence
4) within species nucleotide variation
