# Supplementary material for: The making of a new pathogen: Insights from comparative population genomics of the domesticated wheat pathogenMycosphaerella graminicolaand its wild sister species
Source: HighWire-hosted journal article supplement (doi:10.1101/gr.118851.110), 2011-10-12
Supplement: TableS6.xlsx [file TableS6.xlsx]

## Sheet: Sheet1
Parameter	Definition
Dxy	Divergence between species
Pi	Within species nucleotide diversity
Shared polymorphisms	Polymorphic sites in one species which are also polymorphic in another species. Shared polymorphisms can be of the same nucleotide or they can be of different nucleotides in the two species
alpha	The proportion of non-synonymous divergence attributable to positive selection
f	The fraction of non-synonymous mutations experiencing strong purifying selection
PA/PS	Non-synonymous to synonymous polymorphisms
Ka/Ks	Non-synonymous to synonymous substitutions as defined in (23)
dN/dS	Branch specific ratios of non-synonymous to synonymous mutations as defined in (20)
