# Supplementary material for: The making of a new pathogen: Insights from comparative population genomics of the domesticated wheat pathogenMycosphaerella graminicolaand its wild sister species
Source: HighWire-hosted journal article supplement (doi:10.1101/gr.118851.110), 2011-10-12
Supplement: TableS7.xlsx [file TableS7.xlsx]

## Sheet: Sheet1
Test for differences in alpha between Sp and nonSP categories
For both comparisons approximate 95% confidence intervals (C.I.) on alpha are based on 200 bootstrap datasets
M. graminicola and S1
	No. Genes	Alpha	95% C.I.
Signal peptides	664	0.33	0.26-0.38
Non signal peptides	8481	0.25	0.24-0.27
LRT test P value < 0.001
M. graminicola and S2
	No. Genes	Alpha	95% C.I.
Signal peptides	671	0.24	0.17-0.3
Non signal peptides	8331	0.14	0.11-0.16
LRT test P value < 0.01
Method:
M1: A single alpha and f values estimated for the whole gene set
M2: alpha and f are estimated independently for the SP and non SP gene sets
Likelihood ratio test for differences in alpha between SP and nonSP gene sets
Under the hypothesis alphaSP=alphaNONSP, twice the difference in log likelihood between M1 and M2 (LRTobs) is asymptotically chi-square with 2 d.f
Non applicable here so 200 permutations are used instead to obtain the distribution under H0.
