# Supplementary material for: The making of a new pathogen: Insights from comparative population genomics of the domesticated wheat pathogenMycosphaerella graminicolaand its wild sister species
Source: HighWire-hosted journal article supplement (doi:10.1101/gr.118851.110), 2011-10-12
Supplement: TableS8.xlsx [file TableS8.xlsx]

## Sheet: Table S8
GO ID	GO definition	Genes in category	Mg_S2_f	Mg_S2_alpha	Mg_S1_f	Mg_s1_alpha	S1_S2_f	S1_S2_alpha		Comparison of the fit of alternative models to the data (MK tables pooled per GO for Mg S1)
GO:0051440	regulation of ubiquitin-protein ligase activity during meiotic cell cycle	18	0.102392	-0.403272	0.108304	-1.10163	0.0519637	0.203586		Model	Model	theta estimates	alpha estimates	f estimates	log Likelihood	AIC	P value
GO:0051438	regulation of ubiquitin-protein ligase activity	18	0.102392	-0.403273	0.108304	-1.10163	0.0519637	0.203586		No purifying selection	M0	per GO cat	0	1	-95678.4	191413
GO:0051443	positive regulation of ubiquitin-protein ligase activity	18	0.102392	-0.403273	0.108304	-1.10163	0.0519637	0.203586		uniform purifying selection	M1	per GO cat	0	0.0816268	-1960.81	3979.62
GO:0051444	negative regulation of ubiquitin-protein ligase activity	18	0.102392	-0.403272	0.108304	-1.10163	0.0519637	0.203586		purifying selection with variable intensity	M2	per GO cat	0	per GO	-1069.44	2248.88
GO:0009058	biosynthetic process	31	0.137847	-0.725905	0.134916	-0.58994	0.0997821	-0.321158		uniform purifying selection + homogeneous pos evolution	M3	per GO cat	0.0458537	0.0784612	-1957.58	3975.16
GO:0007264	small GTPase mediated signal transduction	20	0.059474	-0.269473	0.0620457	-0.552592	0.0552242	-0.272496		purifying selection with variable intensity + homogeneous pos evolution	M4	per GO cat	0.04517	per GO	-1066.33	2244.67
GO:0015031	protein transport	19	0.0345403	-0.27586	0.0367518	-0.403776	0.0372618	-0.501953		purifying selection with variable intensity + variable pos selection	M5	per GO cat	per GO	per GO	-975.59	2115.18	p<0.004
GO:0006412	translation	70	0.089889	-0.208282	0.0921084	-0.389497	0.0555908	0.196397
GO:0006418	tRNA aminoacylation for protein translation	18	0.0982193	-0.132752	0.108357	-0.363708	0.073904	0.122245
GO:0016192	vesicle-mediated transport	18	0.0533161	-0.0340814	0.0539135	-0.245577	0.0766754	-0.732766		Comparison of the fit of alternative models to the data (MK tables pooled per GO for Mg S2)
GO:0006457	protein folding	23	0.0768721	-0.234565	0.0694214	-0.208812	0.0454818	0.224105		Model	Model	theta estimates	alpha estimates	f estimates	log Likelihood	AIC
GO:0006629	lipid metabolic process	17	0.0702524	0.0621652	0.0688787	-0.184309	0.0514696	0.299623		No purifying selection	M0	per GO cat	0	1	-125834	251724
GO:0006350	transcription	41	0.0598187	0.179132	0.0615866	-0.172195	0.0731174	-0.0271859		uniform purifying selection	M1	per GO cat	0	0.0908395	-2202.62	4463.25
GO:0006886	intracellular protein transport	39	0.044091	-0.0564054	0.0441055	-0.170026	0.056894	-0.4174		purifying selection with variable intensity	M2	per GO cat	0	per GO	-1078.42	2266.85
GO:0006511	ubiquitin-dependent protein catabolic process	23	0.0578779	0.0791439	0.0567251	-0.0617482	0.0697958	-0.13139		uniform purifying selection + homogeneous pos evolution	M3	per GO cat	0.151123	0.0784917	-2160.07	4380.14
GO:0006355	regulation of transcription	92	0.0844166	0.175723	0.0834862	0.0332862	0.0804701	0.160153		purifying selection with variable intensity + homogeneous pos evolution	M4	per GO cat	0.1534	per GO	-1034.7	2181.4
GO:0006281	DNA repair	22	0.072819	0.201869	0.0766612	0.0466492	0.068105	0.267436		purifying selection with variable intensity + variable pos selection	M5	per GO cat	per GO	per GO	-945.628	2055.26	p<0.006
GO:0006468	protein amino acid phosphorylation	65	0.0897863	0.0459038	0.0872938	0.0543711	0.0474	0.504015
GO:0008152	metabolic process	244	0.0826647	0.179526	0.080901	0.0957485	0.0909253	0.0319721
GO:0005975	carbohydrate metabolic process	63	0.082404	0.250507	0.0869532	0.125052	0.0807262	0.220883		Comparison of the fit of alternative models to the data (MK tables pooled per GO for S1 S2)
GO:0006508	proteolysis	107	0.113402	0.161915	0.113212	0.12553	0.0988015	0.224758		Model	Model	theta estimates	alpha estimates	f estimates	log Likelihood	AIC
GO:0006118	Electron transport	122	0.0844189	0.250716	0.0871811	0.126365	0.0869317	0.178257		No purifying selection	M0	per GO	0	1	-122068	244191
GO:0007165	signal transduction	40	0.080348	0.00685726	0.0736107	0.163741	0.0745366	-0.036635		uniform purifying selection	M1	per GO	0	0.0857066	-2188.55	4435.11
GO:0006810	transport	194	0.0621615	0.31153	0.0612113	0.181144	0.0605267	0.28175		purifying selection with variable intensity	M2	per GO	0	per GO	-1117.33	2344.66
GO:0008643	carbohydrate transport	27	0.0522563	0.311393	0.0544569	0.204432	0.0433522	0.434045		uniform purifying selection + homogeneous pos evolution	M3	per GO	0.14834	0.0739788	-2159.23	4378.47
GO:0046677	response to antibiotic	22	0.0847499	0.317849	0.08316	0.223092	0.125369	-0.0676463		purifying selection with variable intensity + homogeneous pos evolution	M4	per GO	0.1474	per GO	-1088.66	2289.31
GO:0006865	amino acid transport	17	0.0333886	0.585237	0.0290116	0.605443	0.0412672	0.498965		purifying selection with variable intensity + variable pos selection	M5	per GO	per GO	per GO	-1030.39	2224.78	p<0.004
All f and alpha estimates reported here were estimated using model M5 ( see table S7a)
										Notes Model highlighted in bold denotes the model yielding the best fit to the data when using the AIC for model comparison
										per GO denotes parameter estimates for each GO categories ( reported in Table S7 as estimated under Model M5)
										p_value of the null hypothesis that the gain in AIC between M5 and M3 is solely due to between locus heterogenity (and not genuine difference among categories. Each p_value was obtained by permutations of the original dataset (1000 permutation over GO category labels)
