# Supplementary material for: The making of a new pathogen: Insights from comparative population genomics of the domesticated wheat pathogenMycosphaerella graminicolaand its wild sister species
Source: HighWire-hosted journal article supplement (doi:10.1101/gr.118851.110), 2011-10-12
Supplement: TableS9.xlsx [file TableS9.xlsx]

## Sheet: Sheet1
	codons	Pi Mg	Pi S1/S2	Dxy	Non-syn. mutations	Syn. mutations	Non-syn. sites	Syn. Sites	Ka	Ks	Ks/Ks
MAT1-1 M. graminicola-S1	295	0	0	0.0135	5	7	668	218	0.0075	0.0321	0.229
MAT1-1 M. graminicola-S2	295	0	0	0.0598	30	23	668	218	0.0451	0.1123	0.414
MAT1-2 M. graminicola-S1	386	0	0	0.0267	22	9	872	280	0.0251	0.0255	0.782
MAT1-2 M. graminicola-S2	386	0	0	0.0612	50	21	872	280	0.0586	0.061	0.819
