# Supplementary material for: The making of a new pathogen: Insights from comparative population genomics of the domesticated wheat pathogenMycosphaerella graminicolaand its wild sister species
Source: HighWire-hosted journal article supplement (doi:10.1101/gr.118851.110), 2011-10-12
Supplement: TableS10.xlsx [file TableS10.xlsx]

## Sheet: Sheet1
chr	coal.tau1	coal.tau2	coal.tau3	coal.theta1	coal.theta2	coal.a	coal.b	coal.c	coal.a2	coal.b2	coal.c2	coal.rho	coal.s	coal.u	coal.v1	coal.v2	GTR.a	GTR.b	GTR.c	GTR.d	GTR.e	GTR.theta	GTR.theta1	GTR.theta2	Gamma.alpha	logL	time	nbIter	pf1	pf2	pf3	pf4	nbSites	scale	T1	T2	c2	N1	N2	Rec	ILS
1	0.0104662	0.00828275	0.109921	0.0096245	0.0288914	0.0140208	0.0336196	0.0810293	0.0283795	0.0288914	0.0713988	0.390816	0.00166409	0.00681224	0.00668528	0.00735398	1.01471	0.247595	0.266376	0.26488	0.250546	0.54698	0.502095	0.500591	0.531886	-8.13593e+06	8366	144	2292089	361718	339637	376556	3370000	1.051e+06	11000	8705.19	75040.3	5057.69	15182.5	37.1851	0.21252
2	0.0106658	0.00940562	0.112081	0.0147803	0.0303069	0.0148732	0.0355052	0.0817739	0.0301737	0.0303069	0.0716716	0.483856	0.00268686	0.00717066	0.00928208	0.00998132	0.99519	0.238858	0.257825	0.259141	0.244648	0.545791	0.499866	0.499472	0.516807	-4.43241e+06	4431	139	1046089	235535	249652	276724	1808000	1.03133e+06	11000	9700.33	73917.3	7621.71	15628.3	46.9156	0.291137
3	0.0119571	0.00809551	0.112985	0.0105112	0.0336538	0.0154903	0.0382161	0.0793316	0.0312705	0.0336538	0.0681137	0.41261	0.00208902	0.00727077	0.00794443	0.00865567	0.996812	0.241805	0.257162	0.259568	0.244285	0.547266	0.498378	0.499504	0.517101	-4.03457e+06	3139	193	1045006	192717	188356	210921	1637000	919956	11000	7447.51	62661.6	4834.92	15480	44.8511	0.243908
4	0.0104897	0.0107839	0.113873	0.0143936	0.0358729	0.0152146	0.041932	0.0780002	0.0332312	0.0358729	0.0660425	0.48111	0.00248866	0.00832711	0.00999203	0.0108019	1.02791	0.250185	0.266202	0.268477	0.257138	0.547622	0.499668	0.498716	0.517876	-3.22768e+06	3707	186	819252	145357	158873	175518	1299000	1.04865e+06	11000	11308.5	69255.3	7546.91	18809	45.8791	0.257422
5	0.0105982	0.00965359	0.112978	0.0163111	0.0336414	0.0149516	0.0389415	0.0793362	0.0314655	0.0336414	0.0681224	0.559854	0.00325331	0.00787934	0.0113673	0.0121309	0.976446	0.238335	0.254276	0.257733	0.247019	0.548217	0.497544	0.502042	0.502137	-2.83979e+06	1571	51	634980	151038	170364	191618	1148000	1.03791e+06	11000	10019.6	70705.1	8464.74	17458.4	53.9404	0.315315
6	0.0105403	0.00964338	0.11249	0.0152253	0.0338324	0.0148563	0.0391598	0.0786578	0.0314611	0.0338324	0.0673803	0.490974	0.00273479	0.00725239	0.00990205	0.0106078	0.99096	0.23748	0.253959	0.255655	0.242935	0.546974	0.498984	0.500302	0.488317	-2.51408e+06	1081	52	581601	139014	147757	152628	1021000	1.04361e+06	11000	10064	70319	7944.66	17654	47.0456	0.294207
7	0.0100914	0.0107918	0.11379	0.014753	0.0356862	0.0148353	0.0417341	0.0781034	0.0327786	0.0356862	0.066208	0.372276	0.00191546	0.00619571	0.00772755	0.008334	0.999109	0.243017	0.263353	0.257394	0.253402	0.547471	0.498387	0.500905	0.509927	-1.78729e+06	1913	128	436445	102143	87219	97193	723000	1.09004e+06	11000	11763.5	72169.2	8040.66	19449.6	34.1526	0.255065
8	0.00803217	0.0124652	0.108608	0.0245925	0.0323545	0.0137405	0.0391114	0.0762539	0.0312822	0.0323545	0.0654691	0.545342	0.00321134	0.00635932	0.0114038	0.0120201	0.968768	0.240678	0.254805	0.261086	0.239023	0.546763	0.495006	0.500532	0.485798	-2.42784e+06	2656	221	476225	162655	169878	179242	988000	1.36949e+06	11000	17071	89659.5	16839.6	22154.6	39.8207	0.35336
9	0.00768357	0.0128213	0.112137	0.0267909	0.0365447	0.0135848	0.0434647	0.0755927	0.0326864	0.0365447	0.0634112	0.723979	0.00431899	0.00795251	0.0158936	0.0166534	0.930388	0.227135	0.248653	0.252259	0.245478	0.546782	0.498964	0.495161	0.498667	-2.03755e+06	2688	147	384383	126510	149457	155650	816000	1.43163e+06	11000	18355.3	90781.1	19177.3	26159.2	50.5704	0.373906
10	0.00758137	0.012367	0.108993	0.0241818	0.0350257	0.0132401	0.041734	0.0739671	0.0316236	0.0350257	0.0622919	0.716037	0.00404625	0.00810446	0.0150866	0.0158631	1.09485	0.252483	0.273872	0.2729	0.261027	0.547702	0.505038	0.499979	0.491901	-1.7807e+06	1332	180	359981	104329	125966	130724	721000	1.45093e+06	11000	17943.6	90380.9	17543	25409.8	49.3504	0.356019
11	0.00994216	0.0116914	0.114774	0.022327	0.0375214	0.01528	0.043875	0.0772526	0.0341407	0.0375214	0.0647454	0.616137	0.00392381	0.00810071	0.0138823	0.0146614	0.986183	0.238472	0.266716	0.26648	0.255576	0.550629	0.496258	0.498616	0.501448	-1.73128e+06	1550	45	347672	98727	117438	126163	690000	1.1064e+06	11000	12935.4	71634.3	12351.3	20756.8	55.6885	0.353045
12	0.00955032	0.0141876	0.113258	0.0232692	0.0380859	0.0159277	0.0458961	0.0751726	0.0364332	0.0380859	0.0624773	0.654986	0.00407111	0.0102581	0.0153578	0.0163408	1.02796	0.261097	0.284736	0.270897	0.256126	0.547193	0.502862	0.497976	0.552081	-1.38932e+06	956	164	316156	66012	84614	84218	551000	1.15179e+06	11000	16341.2	71961	13400.7	21933.6	56.8666	0.30641
13	0.0110171	0.00851671	0.121969	0.017114	0.0423432	0.0149237	0.0469533	0.0796262	0.0336482	0.0423432	0.0655118	0.93634	0.00584258	0.0113027	0.0206327	0.0216952	1.01263	0.25335	0.278184	0.273415	0.27487	0.552014	0.500716	0.502683	0.512534	-872048	794	59	174830	45225	60369	63576	344000	998448	11000	8503.49	65410.1	8543.72	21138.7	93.7796	0.360305
